# Supplementary material for: Temperature- and pressure-dependent kinetics of the competing C–O bond fission reactions of dimethoxymethane
Source: Royal Society of Chemistry journal article supplement (doi:10.1039/d0cp00136h), 2020-01-01
Supplement: d0cp00136h1.pdf [file d0cp00136h1.pdf]

Electronic Supplementary Information

**Temperature- and pressure-dependent kinetics of the competing  
C–O bond fission reactions of dimethoxymethane**

Leonie Golka, Dennis Gratzfeld, Isabelle Weber<sup>a</sup> and Matthias Olzmann\*

*Institut für Physikalische Chemie, Karlsruher Institut für Technologie (KIT), Kaiserstr. 12,  
76131 Karlsruhe, Germany. E-mail: matthias.olzmann@kit.edu*

<sup>a</sup> Present address: Laboratoire PC2A, Université de Lille 1 - Bâtiment C11, 59655 Villeneuve d'Ascq,  
France

**Table S1** Conditions and first-order rate coefficients,  $k_{1+2}$ , for the decomposition of DMM at nominal pressures of 0.4 bar and 4.7 bar

| $T/K$ | $p/\text{bar}$ | $[\text{DMM}]_0/\text{mol cm}^{-3}$ | $[\text{Ar}]/\text{mol cm}^{-3}$ | $k_{1+2}/\text{s}^{-1}$ |
|-------|----------------|-------------------------------------|----------------------------------|-------------------------|
| 1140  | 0.41           | $1.05 \times 10^{-10}$              | $4.31 \times 10^{-6}$            | 5                       |
| 1140  | 0.42           | $1.05 \times 10^{-10}$              | $4.44 \times 10^{-6}$            | 17                      |
| 1150  | 0.36           | $9.31 \times 10^{-11}$              | $3.81 \times 10^{-6}$            | 29                      |
| 1170  | 0.43           | $1.07 \times 10^{-10}$              | $4.40 \times 10^{-6}$            | 7                       |
| 1190  | 0.4            | $9.61 \times 10^{-11}$              | $4.06 \times 10^{-6}$            | 40                      |
| 1200  | 0.42           | $1.03 \times 10^{-10}$              | $4.22 \times 10^{-6}$            | 7                       |
| 1210  | 0.44           | $1.06 \times 10^{-10}$              | $4.35 \times 10^{-6}$            | 65                      |
| 1230  | 0.41           | $9.75 \times 10^{-11}$              | $3.99 \times 10^{-6}$            | 102                     |
| 1230  | 0.41           | $9.77 \times 10^{-11}$              | $4.01 \times 10^{-6}$            | 191                     |
| 1230  | 0.38           | $9.19 \times 10^{-11}$              | $3.77 \times 10^{-6}$            | 290                     |
| 1240  | 0.37           | $8.85 \times 10^{-11}$              | $3.62 \times 10^{-6}$            | 192                     |
| 1240  | 0.4            | $9.43 \times 10^{-11}$              | $3.86 \times 10^{-6}$            | 296                     |
| 1250  | 0.41           | $9.52 \times 10^{-11}$              | $3.89 \times 10^{-6}$            | 268                     |
| 1250  | 0.4            | $9.20 \times 10^{-11}$              | $3.88 \times 10^{-6}$            | 138                     |
| 1250  | 0.4            | $9.36 \times 10^{-11}$              | $3.84 \times 10^{-6}$            | 274                     |
| 1250  | 0.4            | $9.41 \times 10^{-11}$              | $3.86 \times 10^{-6}$            | 164                     |
| 1260  | 0.4            | $9.30 \times 10^{-11}$              | $3.81 \times 10^{-6}$            | 2130                    |
| 1270  | 0.41           | $9.15 \times 10^{-11}$              | $3.86 \times 10^{-6}$            | 683                     |
| 1280  | 0.43           | $9.79 \times 10^{-11}$              | $4.01 \times 10^{-6}$            | 626                     |
| 1290  | 0.38           | $8.71 \times 10^{-11}$              | $3.57 \times 10^{-6}$            | 707                     |
| 1300  | 0.39           | $8.80 \times 10^{-11}$              | $3.60 \times 10^{-6}$            | 737                     |
| 1300  | 0.38           | $8.59 \times 10^{-11}$              | $3.51 \times 10^{-6}$            | 1270                    |
| 1300  | 0.42           | $9.48 \times 10^{-11}$              | $3.88 \times 10^{-6}$            | 521                     |
| 1310  | 0.4            | $8.89 \times 10^{-11}$              | $3.64 \times 10^{-6}$            | 1360                    |
| 1320  | 0.41           | $8.86 \times 10^{-11}$              | $3.74 \times 10^{-6}$            | 1730                    |

|       |      |                        |                       |       |
|-------|------|------------------------|-----------------------|-------|
| 1320  | 0.41 | $9.12 \times 10^{-11}$ | $3.74 \times 10^{-6}$ | 2220  |
| 1330  | 0.41 | $9.04 \times 10^{-11}$ | $3.71 \times 10^{-6}$ | 3830  |
| 1340  | 0.4  | $8.86 \times 10^{-11}$ | $3.62 \times 10^{-6}$ | 1870  |
| 1340  | 0.38 | $8.33 \times 10^{-11}$ | $3.41 \times 10^{-6}$ | 2000  |
| 1360  | 0.41 | $8.90 \times 10^{-11}$ | $3.64 \times 10^{-6}$ | 2890  |
| 1370  | 0.4  | $8.56 \times 10^{-11}$ | $3.50 \times 10^{-6}$ | 1700  |
| 1370  | 0.42 | $9.09 \times 10^{-11}$ | $3.73 \times 10^{-6}$ | 260   |
| 1370  | 0.39 | $8.28 \times 10^{-11}$ | $3.39 \times 10^{-6}$ | 3750  |
| 1390  | 0.37 | $7.80 \times 10^{-11}$ | $3.20 \times 10^{-6}$ | 5390  |
| 1400  | 0.4  | $8.41 \times 10^{-11}$ | $3.44 \times 10^{-6}$ | 3420  |
| 1400  | 0.38 | $8.07 \times 10^{-11}$ | $3.30 \times 10^{-6}$ | 6520  |
| 1410  | 0.41 | $8.33 \times 10^{-11}$ | $3.52 \times 10^{-6}$ | 5260  |
| 1420  | 0.37 | $7.58 \times 10^{-11}$ | $3.10 \times 10^{-6}$ | 6090  |
| 1430  | 0.37 | $7.53 \times 10^{-11}$ | $3.08 \times 10^{-6}$ | 7560  |
| 1430  | 0.43 | $8.91 \times 10^{-11}$ | $3.65 \times 10^{-6}$ | 284   |
| 1450  | 0.39 | $7.91 \times 10^{-11}$ | $3.24 \times 10^{-6}$ | 8400  |
| 1470  | 0.38 | $7.49 \times 10^{-11}$ | $3.06 \times 10^{-6}$ | 9550  |
| 1470  | 0.38 | $7.70 \times 10^{-11}$ | $3.15 \times 10^{-6}$ | 8230  |
| 1470  | 0.4  | $8.02 \times 10^{-11}$ | $3.29 \times 10^{-6}$ | 7470  |
| 1470  | 0.4  | $7.91 \times 10^{-11}$ | $3.24 \times 10^{-6}$ | 7840  |
| 1500  | 0.39 | $7.62 \times 10^{-11}$ | $3.12 \times 10^{-6}$ | 14700 |
| 1530  | 0.39 | $7.55 \times 10^{-11}$ | $3.09 \times 10^{-6}$ | 14100 |
| 1550  | 0.39 | $7.47 \times 10^{-11}$ | $3.05 \times 10^{-6}$ | 14300 |
| 1550  | 0.41 | $7.85 \times 10^{-11}$ | $3.22 \times 10^{-6}$ | 14500 |
| 1560  | 0.4  | $7.55 \times 10^{-11}$ | $3.09 \times 10^{-6}$ | 41800 |
| <hr/> |      |                        |                       |       |
| 1160  | 4.76 | $1.11 \times 10^{-10}$ | $4.96 \times 10^{-5}$ | 106   |
| 1170  | 4.77 | $9.07 \times 10^{-11}$ | $4.90 \times 10^{-5}$ | 157   |
| 1200  | 4.71 | $8.76 \times 10^{-11}$ | $4.74 \times 10^{-5}$ | 318   |
| 1200  | 4.77 | $8.88 \times 10^{-11}$ | $4.80 \times 10^{-5}$ | 255   |

|      |      |                        |                       |       |
|------|------|------------------------|-----------------------|-------|
| 1210 | 4.75 | $9.26 \times 10^{-11}$ | $4.72 \times 10^{-5}$ | 355   |
| 1220 | 4.74 | $1.04 \times 10^{-10}$ | $4.67 \times 10^{-5}$ | 500   |
| 1240 | 4.81 | $1.04 \times 10^{-10}$ | $4.68 \times 10^{-5}$ | 681   |
| 1250 | 4.71 | $1.01 \times 10^{-10}$ | $4.52 \times 10^{-5}$ | 973   |
| 1250 | 4.81 | $8.60 \times 10^{-11}$ | $4.65 \times 10^{-5}$ | 756   |
| 1250 | 4.68 | $8.80 \times 10^{-11}$ | $4.49 \times 10^{-5}$ | 1020  |
| 1290 | 4.81 | $1.00 \times 10^{-10}$ | $4.49 \times 10^{-5}$ | 2120  |
| 1300 | 4.67 | $9.66 \times 10^{-11}$ | $4.33 \times 10^{-5}$ | 2920  |
| 1310 | 4.63 | $7.89 \times 10^{-11}$ | $4.26 \times 10^{-5}$ | 3730  |
| 1330 | 4.72 | $9.52 \times 10^{-11}$ | $4.27 \times 10^{-5}$ | 5690  |
| 1330 | 4.59 | $8.16 \times 10^{-11}$ | $4.16 \times 10^{-5}$ | 4520  |
| 1350 | 4.62 | $7.60 \times 10^{-11}$ | $4.11 \times 10^{-5}$ | 6960  |
| 1380 | 4.76 | $9.23 \times 10^{-11}$ | $4.14 \times 10^{-5}$ | 9670  |
| 1380 | 4.67 | $7.99 \times 10^{-11}$ | $4.08 \times 10^{-5}$ | 9880  |
| 1400 | 4.53 | $8.66 \times 10^{-11}$ | $3.88 \times 10^{-5}$ | 17000 |
| 1400 | 4.72 | $7.49 \times 10^{-11}$ | $4.05 \times 10^{-5}$ | 17500 |
| 1400 | 4.57 | $7.69 \times 10^{-11}$ | $3.92 \times 10^{-5}$ | 13800 |
| 1410 | 4.71 | $7.44 \times 10^{-11}$ | $4.02 \times 10^{-5}$ | 15500 |
| 1410 | 4.68 | $7.81 \times 10^{-11}$ | $3.98 \times 10^{-5}$ | 14500 |
| 1450 | 4.65 | $7.12 \times 10^{-11}$ | $3.85 \times 10^{-5}$ | 25500 |
| 1450 | 4.67 | $7.14 \times 10^{-11}$ | $3.86 \times 10^{-5}$ | 30900 |

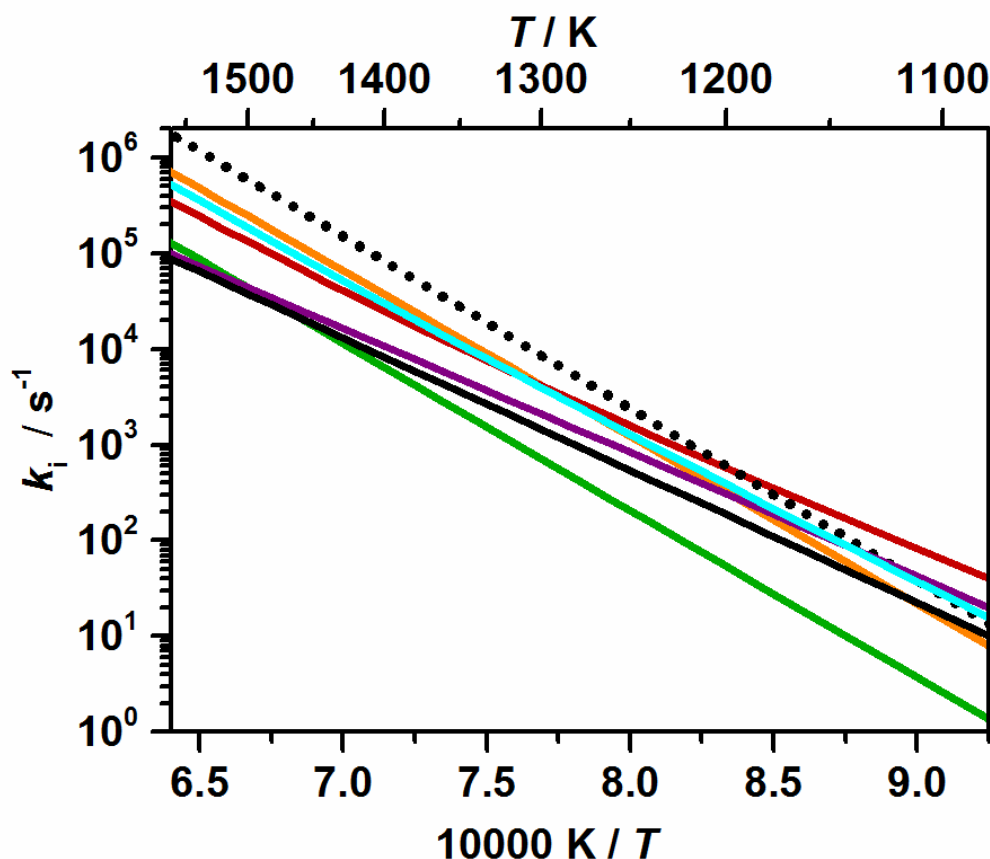

**Figure S1** Comparison of rate coefficient expressions for the C–O bond-fission reactions of DMM at  $p \sim 1$  bar; black solid line:  $k_{1+2} = k_1 + k_2$  from this work, black dotted line: high-pressure limit  $k_1^\infty + k_2^\infty$  from this work, purple:  $k_{1+2}$  from Peukert *et al.* [1], green:  $k_{1+2}$  from Marrodán *et al.* [2], orange:  $k_{1+2}$  from Vermeire *et al.* [3], red:  $k_{1+2+3} = k_1 + k_2 + k_3$  from Sun *et al.* [4], cyan:  $k_{1+2+3+4} = k_1 + k_2 + k_3 + k_4$  from Jacobs *et al.* [5].

## References

- [1] S. Peukert, P. Sela, D. Nativel, J. Herzler, M. Fikri and C. Schulz, *J. Phys. Chem. A*, 2018, **122**, 7559–7571 (ref. [23] of the main text).
- [2] L. Marrodán, E. Royo, Á. Millera, R. Bilbao and M. U. Alzueta, *Energy Fuels*, 2015, **29**, 3507–3517 (ref. [9] of the main text).
- [3] F. H. Vermeire, H.-H. Carstensen, O. Herbinet, F. Battin-Leclerc, G. B. Marin and K. M. Van Geem, *Combust. Flame*, 2018, **190**, 270–283 (ref. [15] of the main text).
- [4] W. Sun, T. Tao, M. Lailliau, N. Hansen, B. Yang and P. Dagaut, *Combust. Flame*, 2018, **193**, 491–501 (ref. [18] of the main text).
- [5] S. Jacobs, M. Döntgen, A. B. S. Alqaity, W. A. Kopp, L. C. Kröger, U. Burke, H. Pitsch, K. Leonhard, H. J. Curran and K. A. Heufer, *Combust. Flame*, 2019, **205**, 522–533 (ref. [24] of the main text).

**Table S2** Cartesian coordinates (in Å) of reactants and products in reactions (R1) to (R6) from B2PLYP-D3/def2-TZVPP calculations

|                                                     |                                      | X         | Y         | Z         |
|-----------------------------------------------------|--------------------------------------|-----------|-----------|-----------|
| <b>CH<sub>3</sub>OCH<sub>2</sub>OCH<sub>3</sub></b> | C                                    | 0         | 0         | 0.930333  |
|                                                     | H                                    | -0.710583 | 0.551249  | 1.550536  |
|                                                     | H                                    | 0.710583  | -0.551249 | 1.550536  |
|                                                     | O                                    | 0.77856   | 0.877733  | 0.165382  |
|                                                     | C                                    | 0         | 1.813257  | -0.566112 |
|                                                     | H                                    | -0.627951 | 2.404283  | 0.106697  |
|                                                     | H                                    | 0.695755  | 2.47096   | -1.077679 |
|                                                     | H                                    | -0.638367 | 1.316637  | -1.296932 |
|                                                     | O                                    | -0.777856 | -0.877733 | 0.165382  |
|                                                     | C                                    | 0         | -1.813257 | -0.566112 |
|                                                     | H                                    | -0.695755 | -2.47096  | -1.077679 |
|                                                     | H                                    | 0.638367  | -1.316637 | -1.296932 |
|                                                     | H                                    | 0.627951  | -2.404283 | 0.106697  |
|                                                     | <b>CH<sub>2</sub>OCH<sub>3</sub></b> | C         | -1.197182 | 0.228141  |
| H                                                   |                                      | -1.122285 | 1.269323  | -0.217793 |
| H                                                   |                                      | -2.120306 | -0.317099 | -0.029403 |
| O                                                   |                                      | -0.091787 | -0.545475 | -0.036932 |
| C                                                   |                                      | 1.134078  | 0.169624  | 0.01265   |
| H                                                   |                                      | 1.252195  | 0.661501  | 0.978753  |
| H                                                   |                                      | 1.929449  | -0.554277 | -0.129647 |
| H                                                   |                                      | 1.173867  | 0.917762  | -0.781575 |
| <b>CH<sub>3</sub></b>                               | C                                    | 0         | 0         | 0.000005  |
|                                                     | H                                    | 0.106909  | -1.070538 | -0.00001  |
|                                                     | H                                    | -0.980569 | 0.442682  | -0.00001  |
|                                                     | H                                    | 0.87366   | 0.627853  | -0.00001  |
| <b>OCH<sub>2</sub>OCH<sub>3</sub></b>               | C                                    | -0.750964 | -0.453548 | 0.21654   |
|                                                     | H                                    | -1.327698 | -1.344939 | -0.064772 |
|                                                     | H                                    | -0.724972 | -0.424171 | 1.326896  |
|                                                     | O                                    | -1.421129 | 0.65014   | -0.149479 |
|                                                     | O                                    | 0.530182  | -0.62425  | -0.309856 |
|                                                     | C                                    | 1.438789  | 0.391561  | 0.090677  |
|                                                     | H                                    | 2.398846  | 0.147674  | -0.351772 |
|                                                     | H                                    | 1.115256  | 1.37154   | -0.259189 |
|                                                     | H                                    | 1.539196  | 0.4146934 | 1.180211  |
| <b>OCH<sub>3</sub></b>                              | C                                    | 0.575987  | 0.000001  | -0.012789 |
|                                                     | H                                    | 1.002502  | 0.904687  | -0.456725 |
|                                                     | H                                    | 0.867815  | -0.000019 | 1.050778  |
|                                                     | H                                    | 1.002499  | -0.904673 | -0.456754 |
|                                                     | O                                    | -0.791092 | 0         | -0.007586 |
| <b>H<sub>2</sub>CO</b>                              | C                                    | 0         | 0.529073  | 0         |
|                                                     | H                                    | 0.935705  | 1.112168  | 0         |
|                                                     | H                                    | -0.935705 | 1.112167  | 0         |
|                                                     | O                                    | 0         | -0.674846 | 0         |

**Table S3** Rotational constants (in  $\text{cm}^{-1}$ ) of reactants and products in reactions (R1) to (R6) from B2PLYP-D3/def2-TZVPP calculations

|                                                     | <b>A</b>    | <b>B</b>   | <b>C</b>    |
|-----------------------------------------------------|-------------|------------|-------------|
| <b>CH<sub>3</sub>OCH<sub>2</sub>OCH<sub>3</sub></b> | 0,3440099   | 0.10905044 | 0.10239384  |
| <b>CH<sub>2</sub>OCH<sub>3</sub></b>                | 1.57726483  | 0.35886593 | 0.310781    |
| <b>CH<sub>3</sub></b>                               | 9.63400887  | 9.63396951 | 4.81699476  |
| <b>OCH<sub>2</sub>OCH<sub>3</sub></b>               | 0.62629194  | 0.19549291 | 0.16621966  |
| <b>OCH<sub>3</sub></b>                              | 5.292425335 | 0.93392643 | 0.928056369 |
| <b>H<sub>2</sub>CO</b>                              | 9.55219894  | 1.29926084 | 1.14369855  |

**Table S4** Harmonic wavenumbers (in  $\text{cm}^{-1}$ ) of reactants and products in reactions (R1) to (R6) from B2PLYP-D3/def2-TZVPP calculations

|                                                     |                                                                                                                                                                                                                                                                                                                                                              |
|-----------------------------------------------------|--------------------------------------------------------------------------------------------------------------------------------------------------------------------------------------------------------------------------------------------------------------------------------------------------------------------------------------------------------------|
| <b>CH<sub>3</sub>OCH<sub>2</sub>OCH<sub>3</sub></b> | 3158.2746, 3158.003, 3095.6578, 3095.3491, 3087.6616, 3032.8787, 3024.7457, 3023.7175, 1530.5627, 1522.806, 1517.3826, 1502.4537, 1501.7991, 1492.7256, 1479.6731, 1439.1076, 1345.6172, 1264.9865, 1222.258, 1188.8885, 1187.8252, 1169.7711, 1146.1054, 1074.4336, 950.9244, 936.9361, 608.0741, 455.1731, 322.3773, 224.3512, 157.9425, 133.9003, 93.4922 |
| <b>CH<sub>2</sub>OCH<sub>3</sub></b>                | 3293.6975, 3167.8444, 3140.9449, 3099.3261, 3035.2703, 1519.125, 1510.4072, 1504.5839, 1472.903, 1294.5564, 1262.0484, 1182.977, 1146.775, 968.6832, 587.0216, 434.3515, 302.2726, 165.1975                                                                                                                                                                  |
| <b>CH<sub>3</sub></b>                               | 3324.7538, 3324.7472, 3143.6574, 1429.3806, 1429.3734, 521.1626                                                                                                                                                                                                                                                                                              |
| <b>OCH<sub>2</sub>OCH<sub>3</sub></b>               | 3166.0486, 3099.0609, 3020.4636, 2997.6555, 2851.4681, 1525.9739, 1503.2777, 1487.5821, 1390.5227, 1346.53, 1264.3748, 1193.3927, 1184.8951, 1123.6383, 1054.8563, 938.6581, 783.3246, 602.1616, 350.113, 190.1323, 133.6607                                                                                                                                 |
| <b>OCH<sub>3</sub></b>                              | 3064.9694, 3020.6753, 2943.2846, 1530.123, 1389.0458, 1386.9819, 1116.4847, 965.1717, 737.2354                                                                                                                                                                                                                                                               |
| <b>H<sub>2</sub>CO</b>                              | 2991.6966, 2929.1485, 1790.5879, 1545.3393, 1274.9597, 1208.5899                                                                                                                                                                                                                                                                                             |

**Table S5** ‘log  $p$ ’ parameterization of the pressure-dependent rate coefficients  $k_1$  and  $k_2$  in CHEMKIN-PRO format<sup>a</sup>

|                          |            |        |             |
|--------------------------|------------|--------|-------------|
| CH3OCH2OCH3=CH3+CH3OCH2O | 2.74E+108  | -27.94 | 119635.52   |
| PLOG/ 1E-3               | 2.74E+108  | -27.94 | 119635.52 / |
| PLOG/ 1E-2               | 7.57E+111  | -28.52 | 125253.35 / |
| PLOG/ 1E-1               | 2.52E+113  | -28.54 | 130279.60 / |
| PLOG/ 4E-1               | 4.55E+112  | -28.08 | 132480.52 / |
| PLOG/ 1.0                | 1.422E+111 | -27.49 | 133333.59 / |
| PLOG/ 4.0                | 6.59E+106  | -26.02 | 133278.13 / |
| PLOG/ 1E+1               | 1.81E+102  | -24.57 | 132048.95 / |
| PLOG/ 1E+2               | 2.88E+83   | -18.94 | 123350.93 / |
| PLOG/ 1E+3               | 8.51E+55   | -10.94 | 107037.16 / |
|                          |            |        |             |
| CH3OCH2OCH3=CH3O+CH3OCH2 | 1.13E+108  | -28.39 | 121297.17   |
| PLOG/ 1E-3               | 1.13E+108  | -28.39 | 121297.17 / |
| PLOG/ 1E-2               | 7.51E+118  | -31.07 | 132923.31 / |
| PLOG/ 1E-1               | 3.43E+114  | -29.24 | 133132.81 / |
| PLOG/ 4E-1               | 3.69E+114  | -28.96 | 136015.54 / |
| PLOG/ 1.0                | 4.98E+113  | -28.53 | 137441.66 / |
| PLOG/ 4.0                | 3.39E+110  | -27.35 | 138466.60 / |
| PLOG/ 1E+1               | 7.25E+106  | -26.13 | 138085.96 / |
| PLOG/ 1E+2               | 1.66E+90   | -21.03 | 131634.45 / |
| PLOG/ 1E+3               | 5.60E+62   | -13.00 | 116148.55 / |

<sup>a</sup> the notation is as follows:

|             |                        |          |          |            |
|-------------|------------------------|----------|----------|------------|
| first line: | reactant(s)=product(s) | dummy    | dummy    | dummy      |
| next lines: | PLOG/pressure $p_j$    | $B(p_j)$ | $n(p_j)$ | $C(p_j)$ / |

$$\text{for } k(T, p_j) = B(p_j) T^{n(p_j)} \exp(-C(p_j) / RT)$$

units:  $[k] = \text{s}^{-1}$ ,  $[p_j] = \text{bar}$ ,  $[T] = \text{K}$ ,  $[C(p_j)] = \text{cal mol}^{-1}$

The rate coefficient  $k$  for an arbitrary pressure  $p$  is obtained from the following interpolation:

$$\ln k(T, p) = \ln k(T, p_i) + \{ \ln k(T, p_{i+1}) - \ln k(T, p_i) \} \frac{\ln p - \ln p_i}{\ln p_{i+1} - \ln p_i}$$

‘PLOG’ is the CHEMKIN keyword for this kind of representation
